# Supplementary material
Source: PubMed Central journal article supplement (PMC4125493)

Supplementary Figure 1  
for Figure 1

**A**

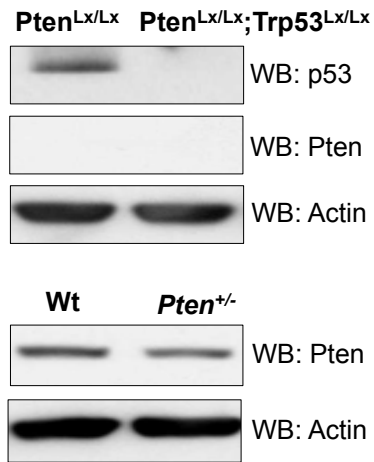

**B**

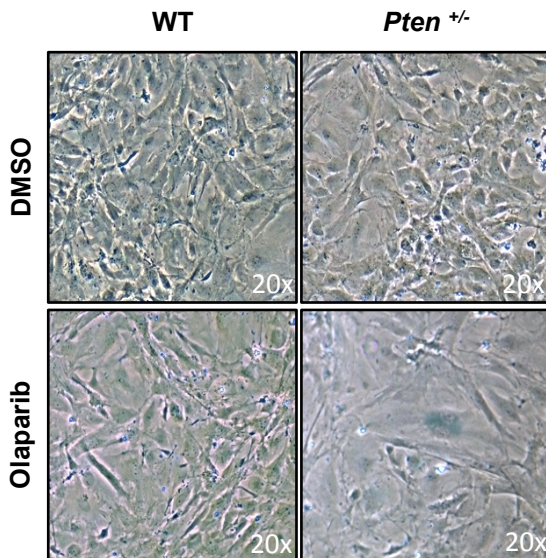

**C**

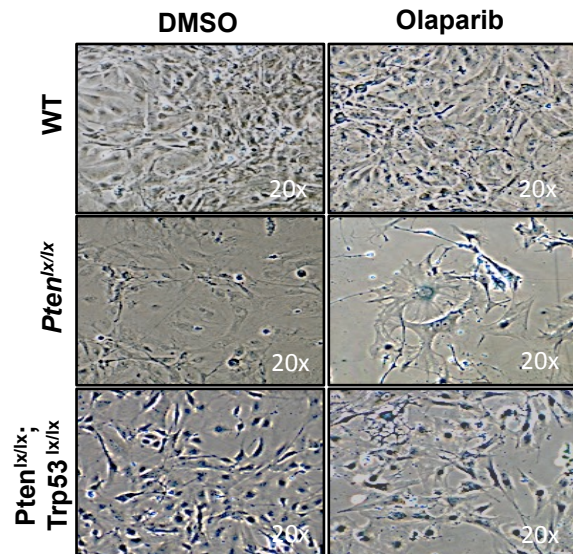

**D**

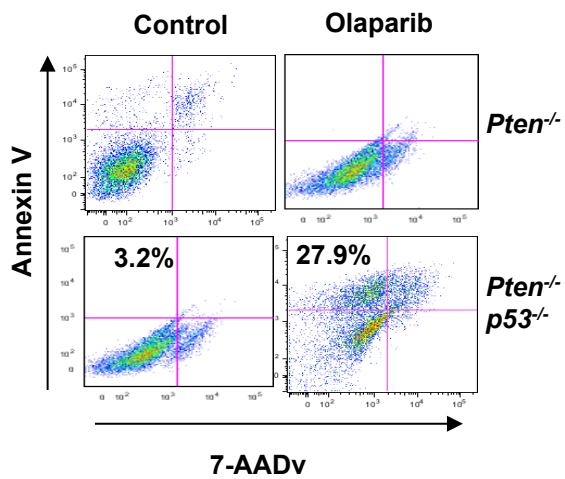

**E**

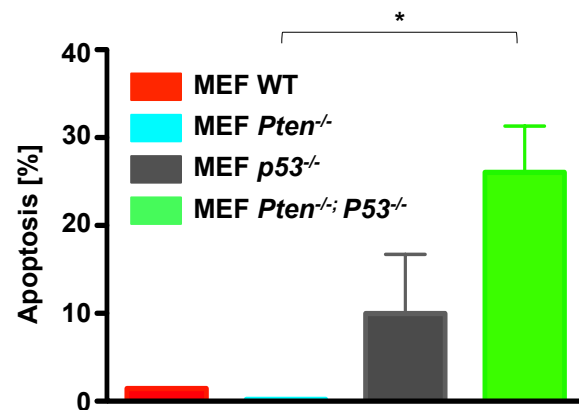

Supplement: NIHMS599764-supplement-2.pdf [file NIHMS599764-supplement-2.pdf]

Supplementary Figure 2  
for Figure 2

**A**

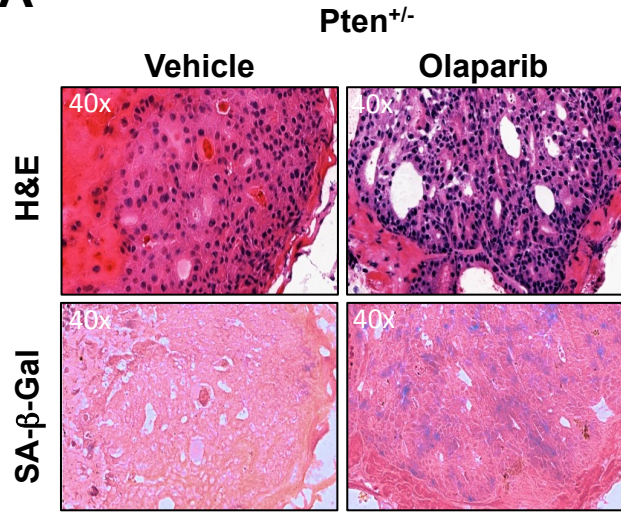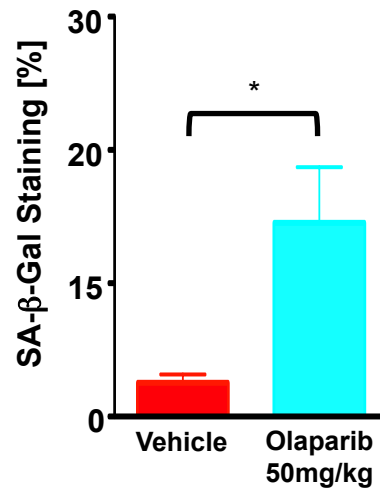

**B**

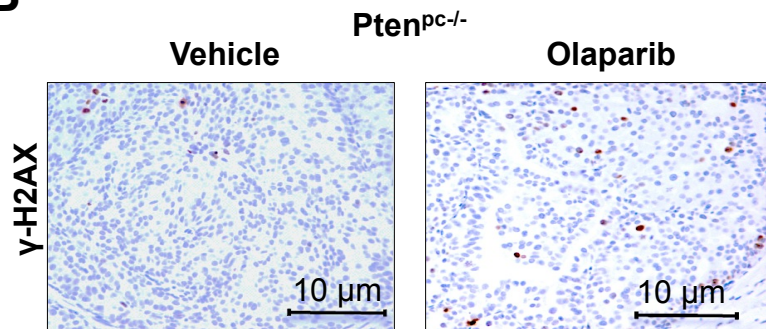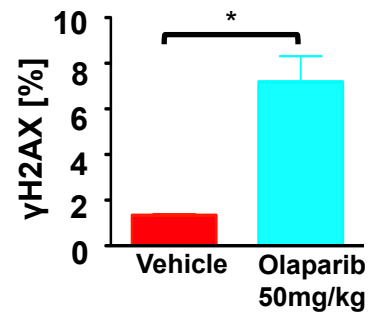

**C**

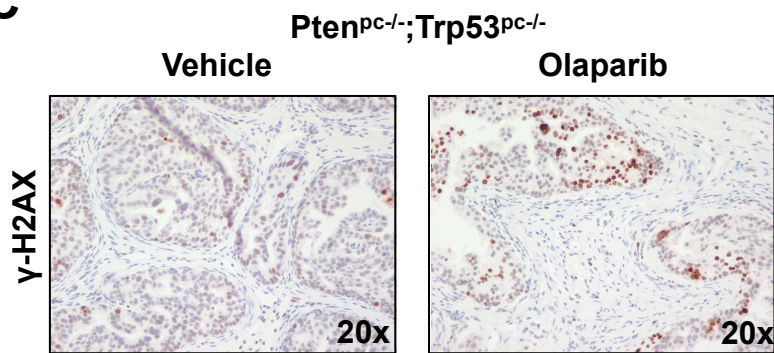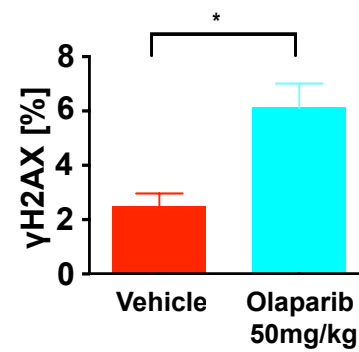

**D**

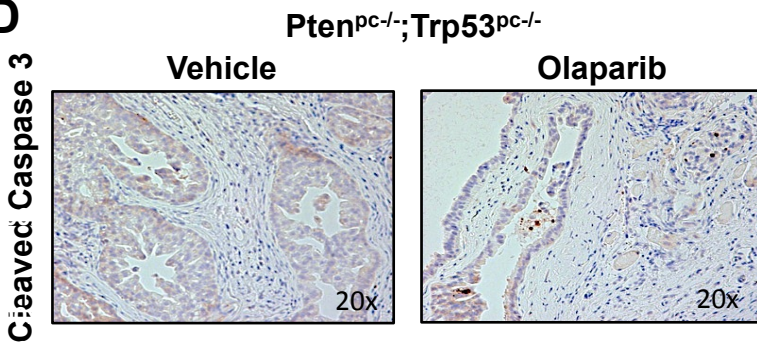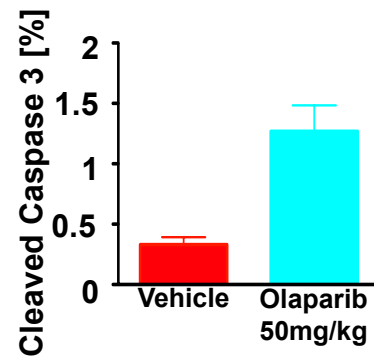

Supplement: NIHMS599764-supplement-3.pdf [file NIHMS599764-supplement-3.pdf]

Supplementary Figure 4  
for Figure 3

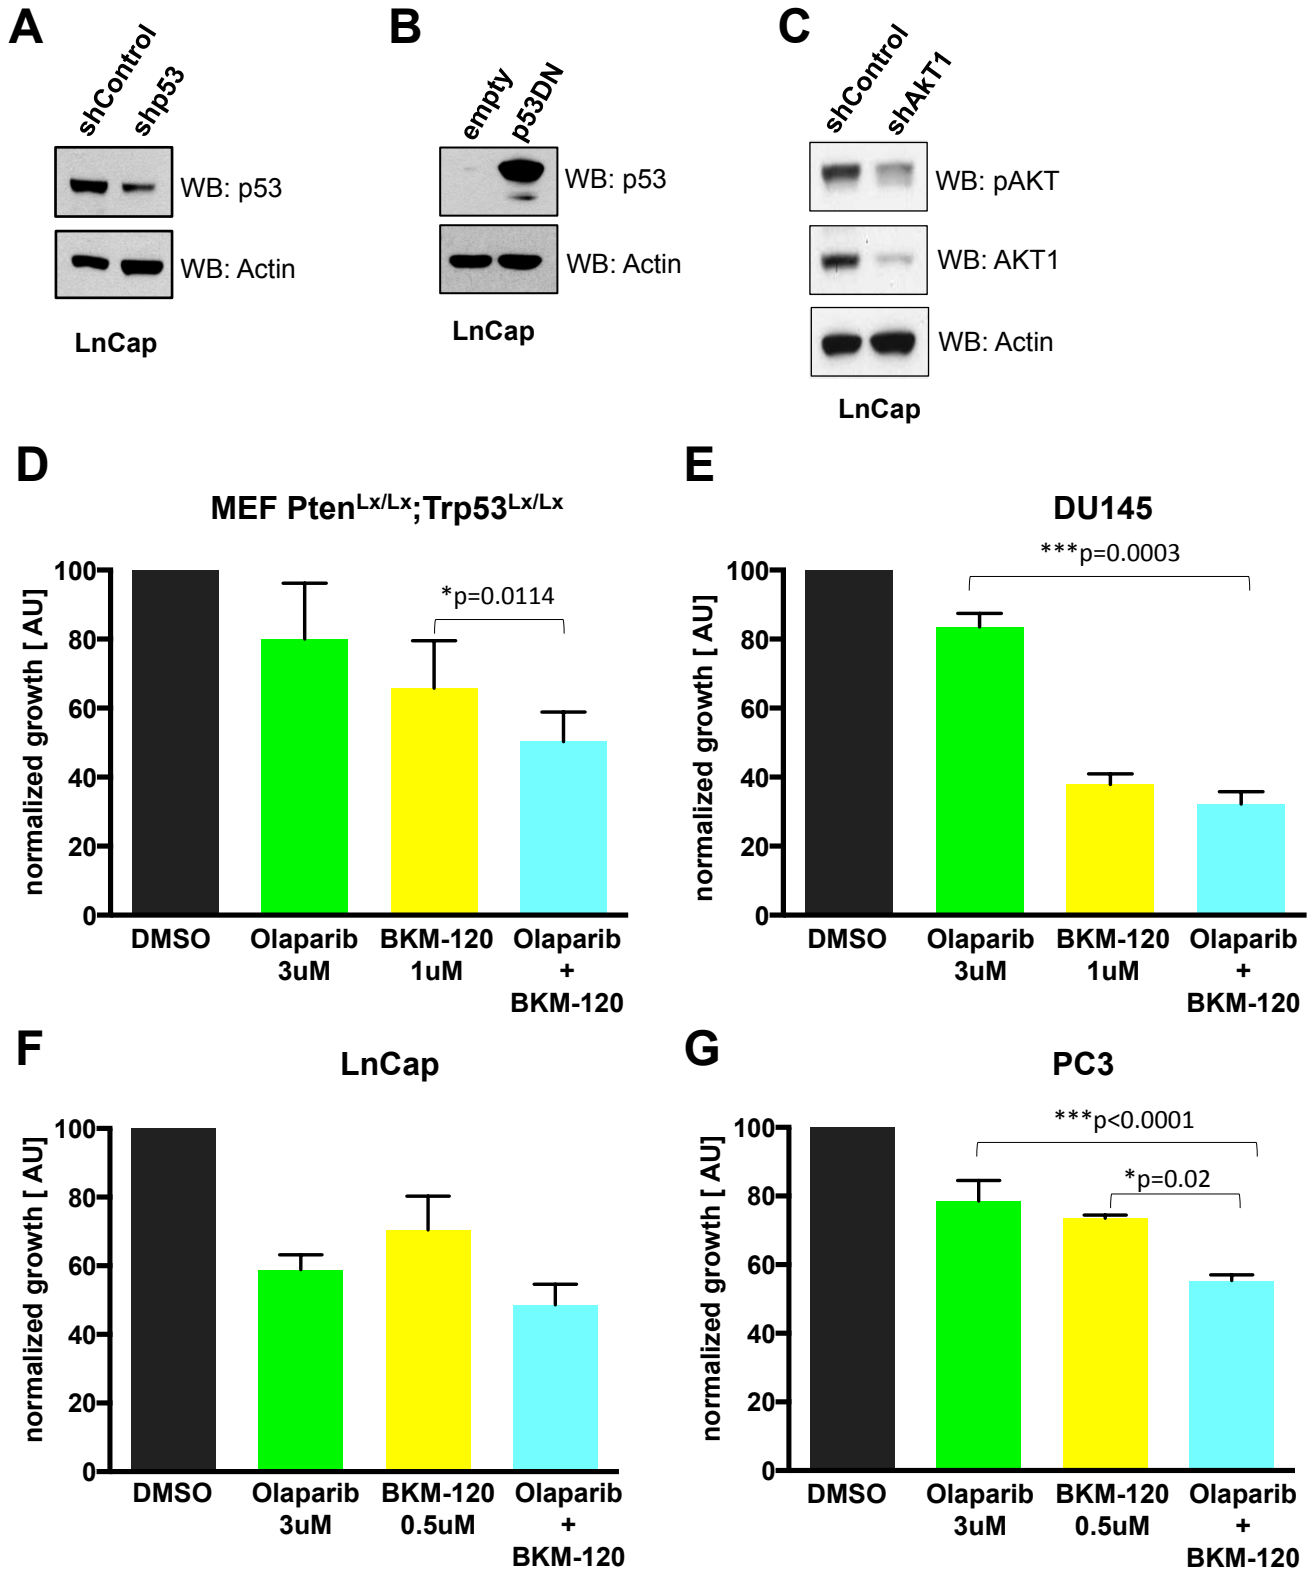

Supplement: NIHMS599764-supplement-5.pdf [file NIHMS599764-supplement-5.pdf]

Supplementary Figure 5  
for Figure 4

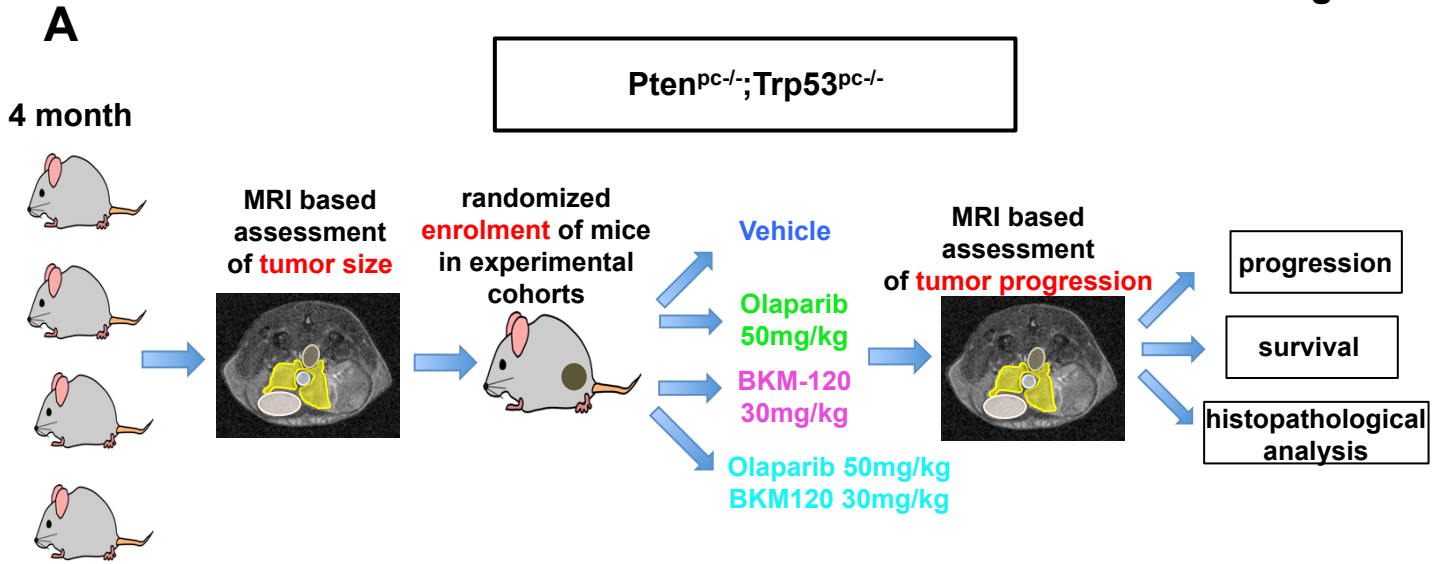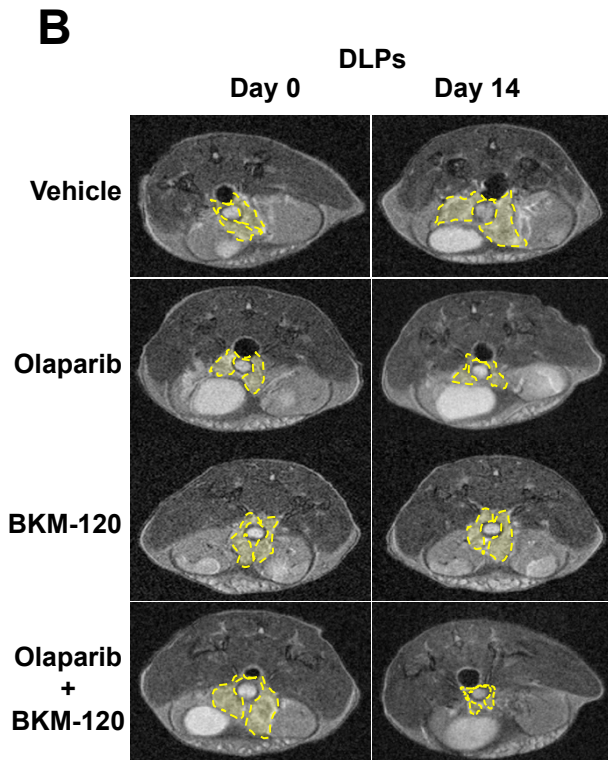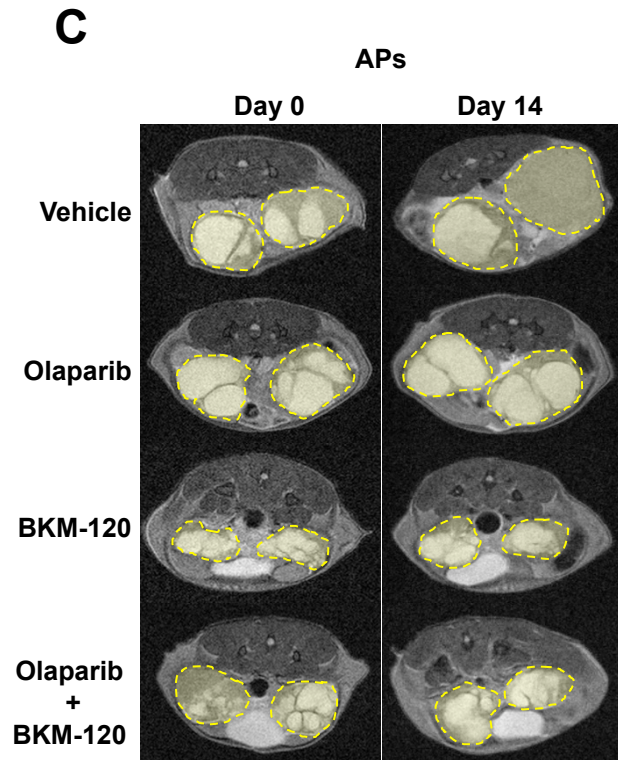

Supplement: NIHMS599764-supplement-6.pdf [file NIHMS599764-supplement-6.pdf]

Supplementary Figure 7  
for Figure 4

**A**

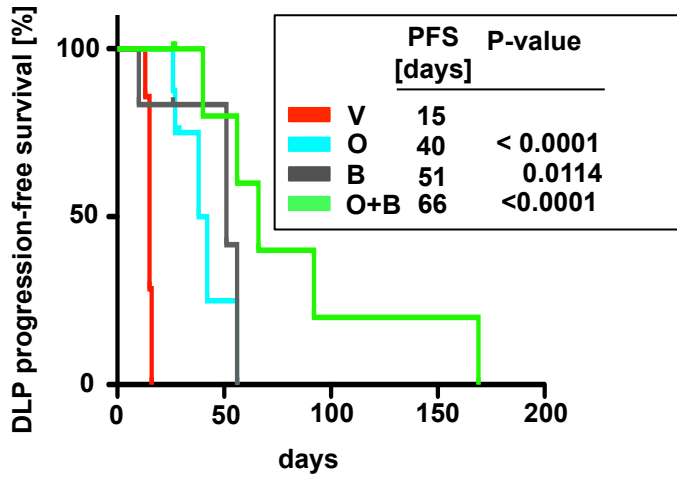

**B**

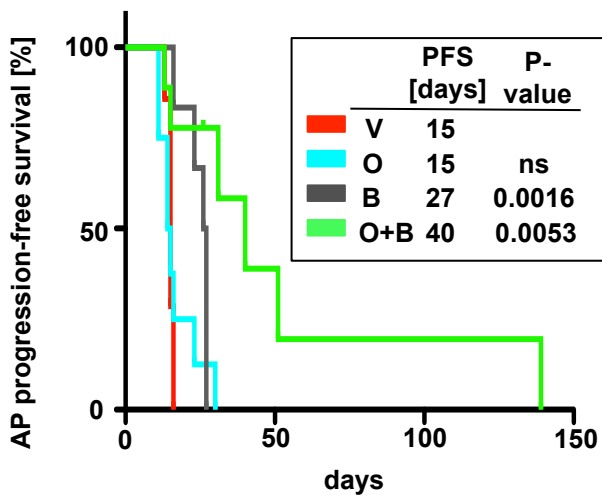

**C**

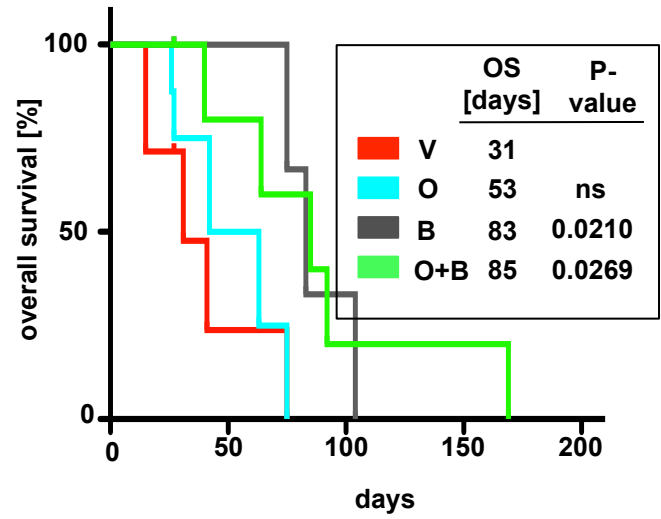

Supplement: NIHMS599764-supplement-8.pdf [file NIHMS599764-supplement-8.pdf]
